# Supplementary material for: Elevated CO2 Concentrations Impact the Semiochemistry of Aphid Honeydew without Having a Cascade Effect on an Aphid Predator
Source: MDPI journal article supplement (doi:10.3390/insects9020047), 2018-04-20
Supplement: s1 [file s1]

## Supplementary material

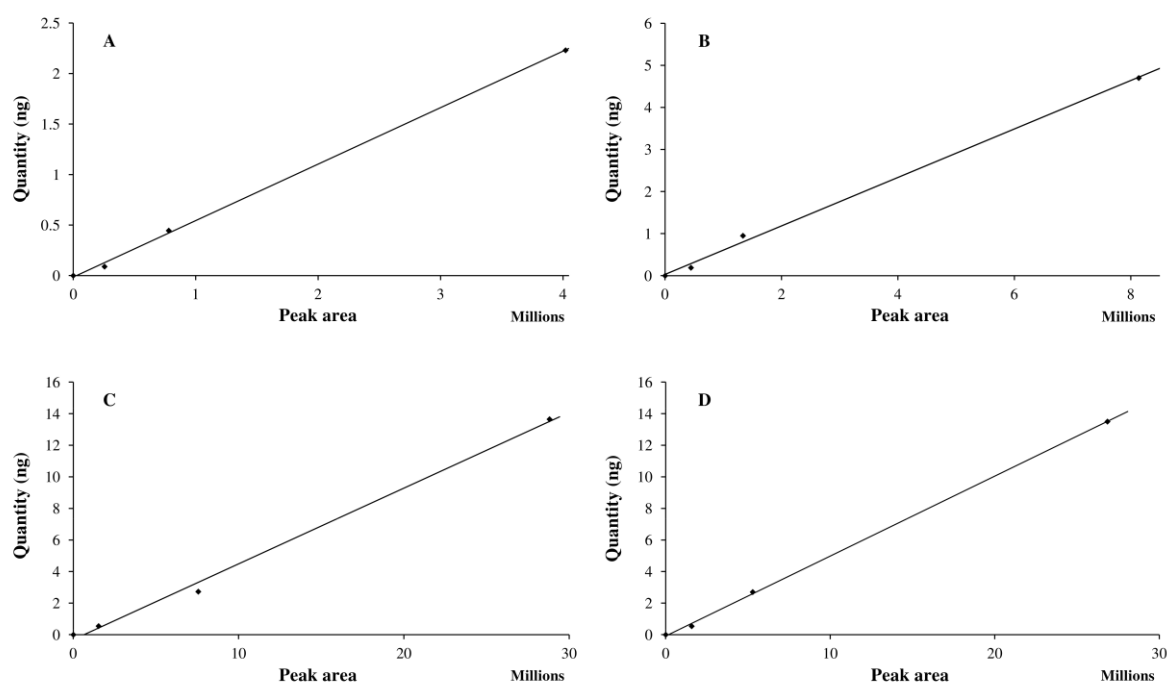

**Figure S1.** Calibration curves of different volatile organic compounds from aphid honeydew obtained by the least squares fit analysis method. The quantity of four compounds was estimated: Isobutanol (A), 3-methyl-2-buten-1-ol (B), 2-methyl-1-butanol (C), and 3-methyl-1-butanol (D).

**Table S1.** Characteristics of the calibration curves and synthetic standards of the different volatile organic compounds from aphid honeydew.

| Compound                        | CAS #    | Purity (%) | Linear correlation (y =) | R <sup>2</sup> |
|---------------------------------|----------|------------|--------------------------|----------------|
| Isobutanol                      | 78-83-1  | > 99       | $6.10^{-07}x - 0.0152$   | 0.9993         |
| 3-methyl-1-butanol <sup>a</sup> | 123-51-3 | > 99       | $5.10^{-07}x - 0.0826$   | 0.9996         |
| 2-methyl-1-butanol <sup>a</sup> | 137-32-6 | > 99       | $5.10^{-07}x - 0.3117$   | 0.9961         |
| 3-methyl-2-buten-1-ol           | 556-82-1 | 99         | $6.10^{-07}x + 0.0315$   | 0.9963         |

<sup>a</sup> Quantity of 3-methylbutanal and 2-methylbutanal were estimated with the linear correlations of their corresponding alcohols
